# Supplementary material for: Identification of Novel Candidate CD8+ T Cell Epitopes of the SARS-CoV2 with Homology to Other Seasonal Coronaviruses
Source: MDPI journal article supplement (doi:10.3390/v13060972), 2021-05-24
Supplement: s1 [file s1]

**Supplementary table 1: Homology of different proteins of the SARS-CoV2 with OC43, HKU1, and NL63 corona viruses**

| Protein      | OC43 % | HKU1 % | NL63 % |
|--------------|--------|--------|--------|
| Spike        | 29     | 28     | 23     |
| Envelope     | 24     | 27     | 20     |
| Membrane     | 34     | 34     | 30     |
| Nucleocapsid | 33     | 30     | 27     |
| NSP1         | 19     | 18     | 12     |
| NSP2         | 19     | 19     | 18     |
| NSP3         | 24     | 23     | 21     |
| NSP4         | 41     | 42     | 30     |
| NSP5         | 48     | 49     | 44     |
| NSP6         | 33     | 32     | 27     |
| NSP7         | 46     | 42     | 39     |
| NSP8         | 44     | 46     | 47     |
| NSP9         | 45     | 44     | 44     |
| NSP10        | 52     | 50     | 50     |

|       |    |    |    |
|-------|----|----|----|
| NSP11 | 54 | 54 | 34 |
| NSP12 | 66 | 67 | 60 |
| NSP13 | 68 | 65 | 61 |
| NSP14 | 57 | 59 | 53 |
| NSP15 | 44 | 46 | 44 |
| NSP16 | 67 | 65 | 57 |

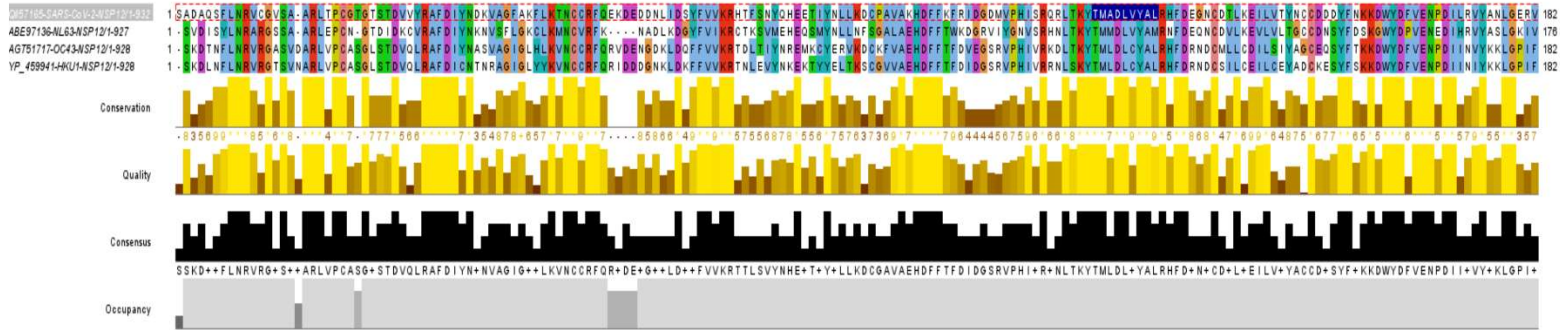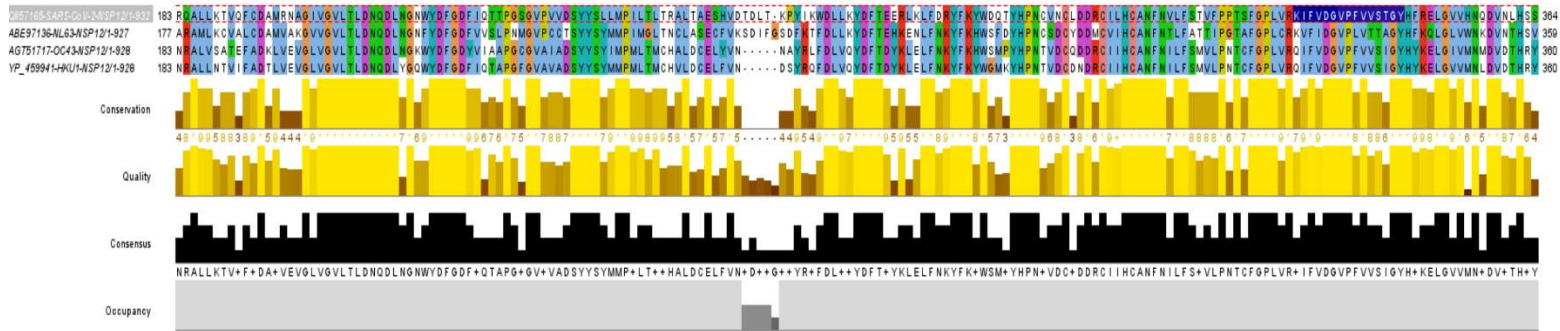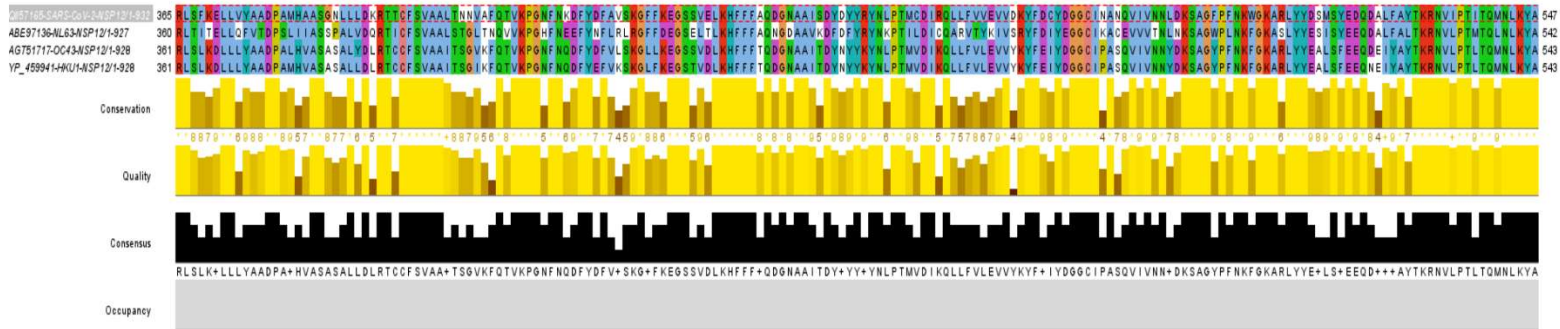

NSP12 A

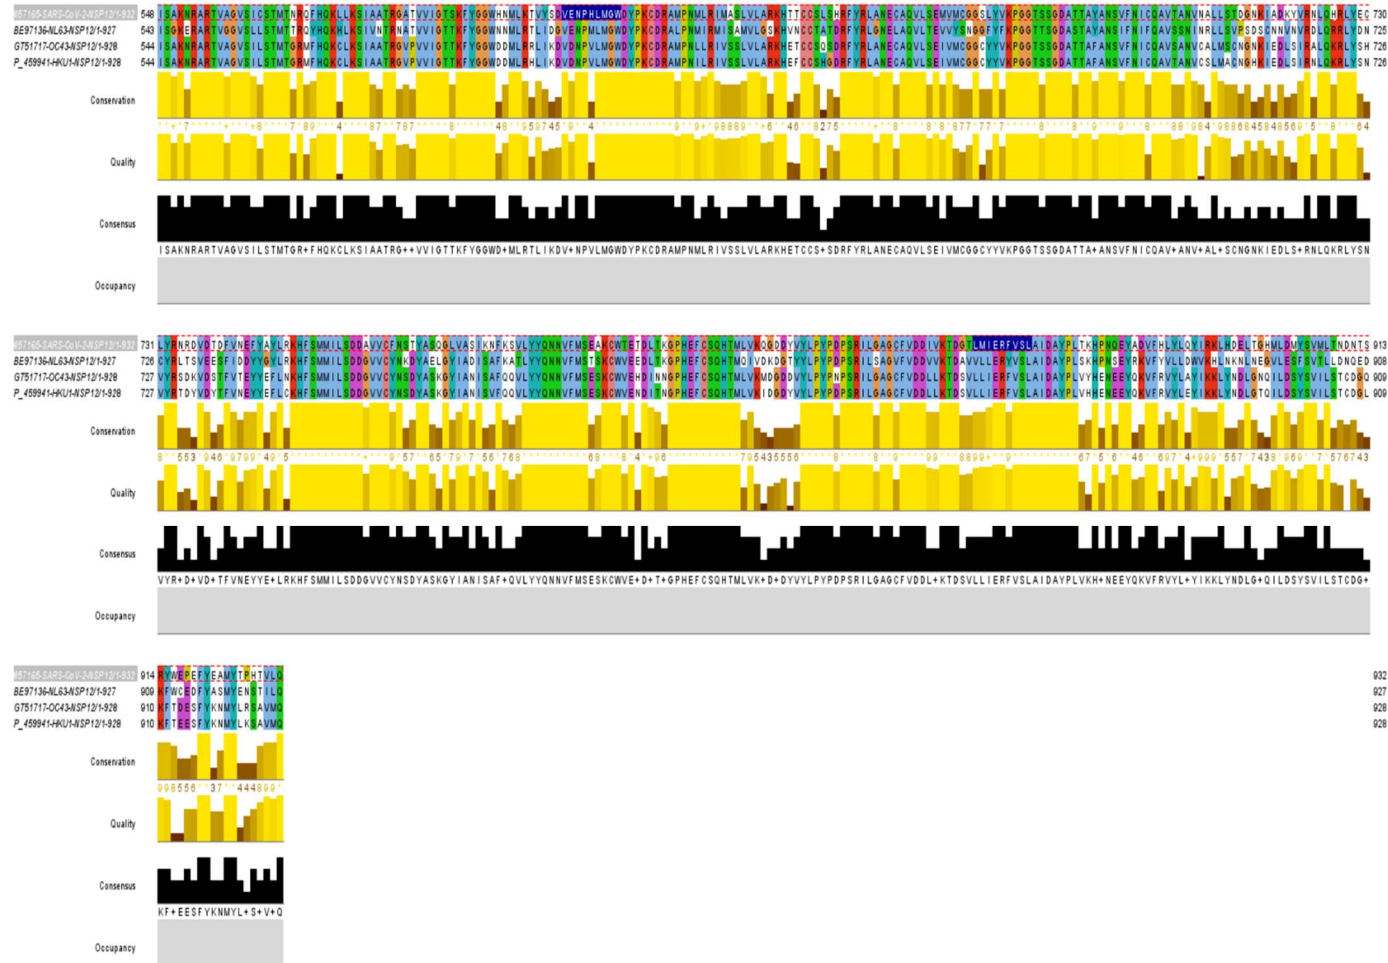

**Supplementary Figure 1:** Multiple alignment of 9mer and 10mer peptide sequences identified from SARS-CoV2 NSP12 with OC43, HKU1 and NL63. All peptides shown have a predicted binding score of  $\geq 0.90$

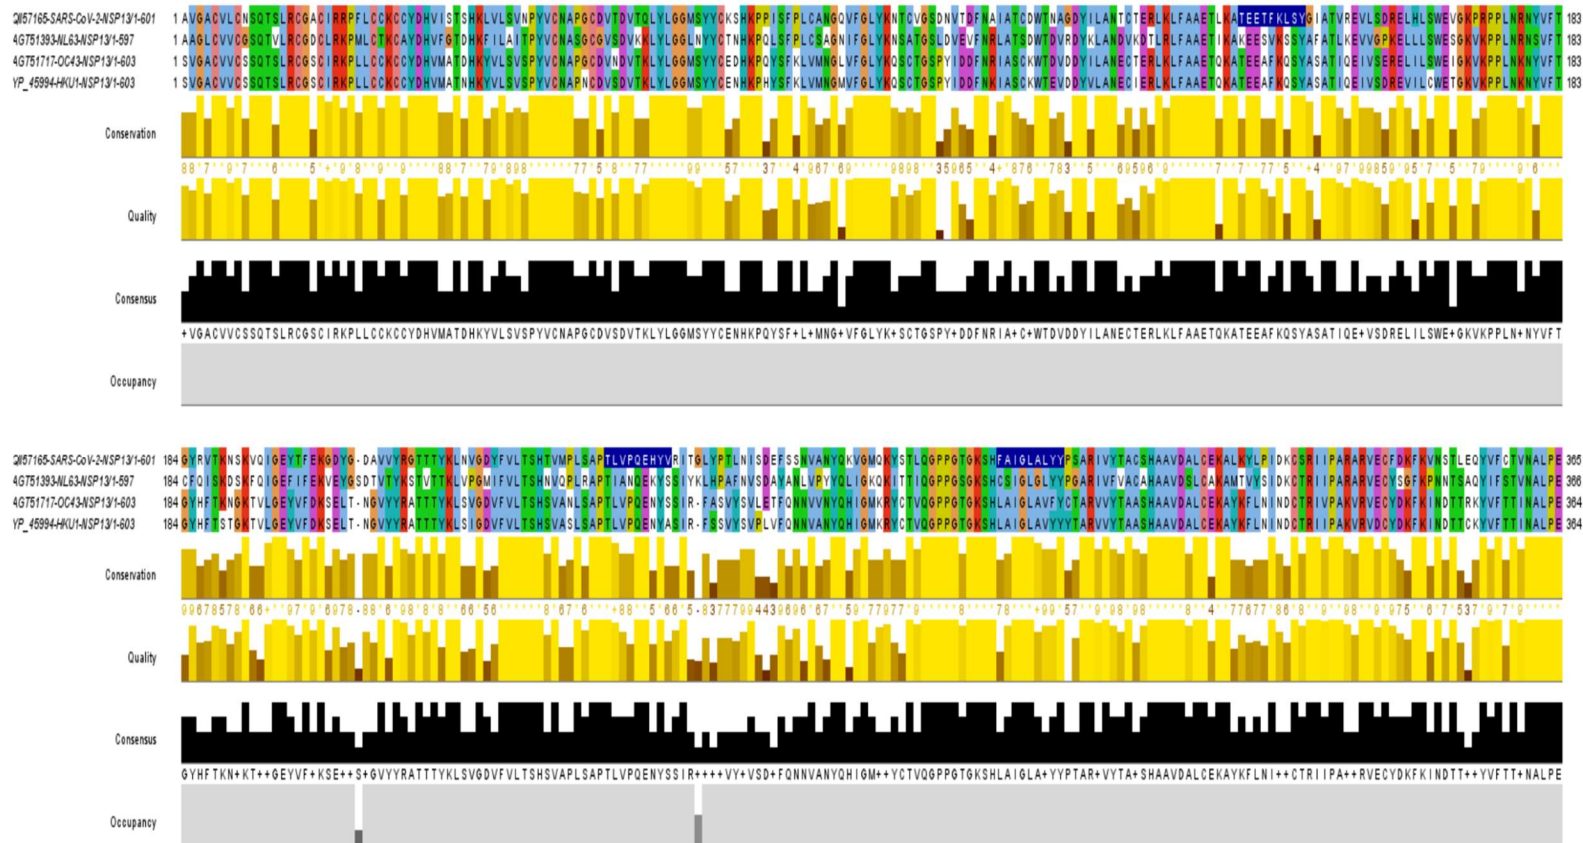

NSP13 A



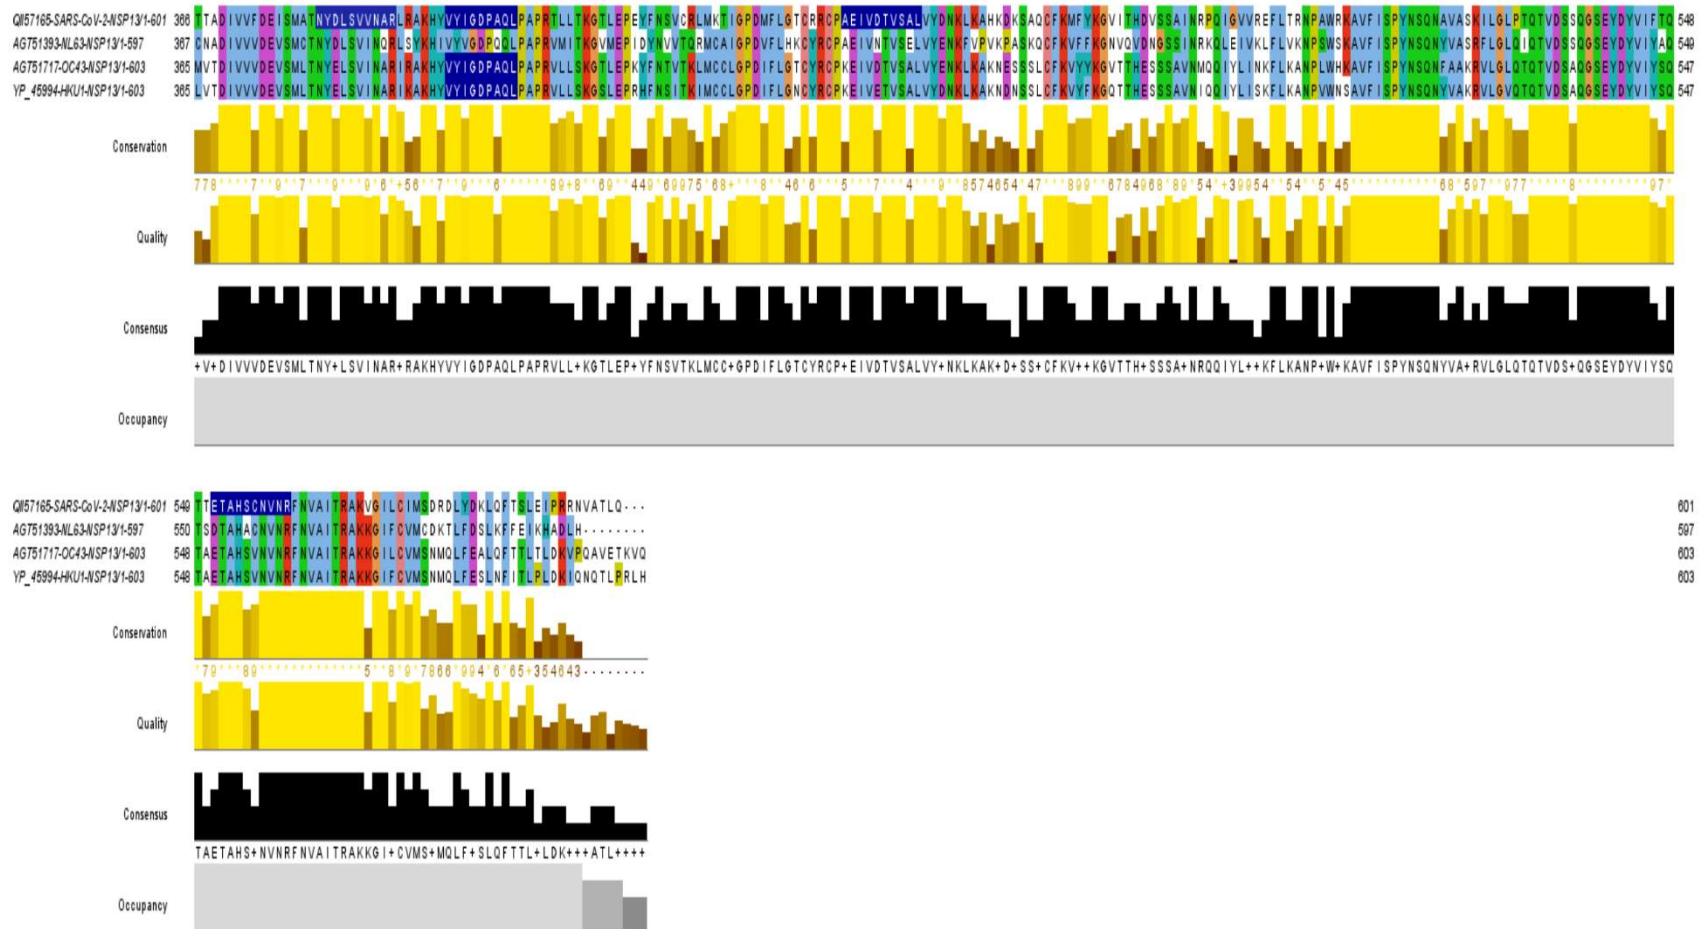

## NSP13 B

**Supplementary Figure 2:** Multiple alignment of 9mer and 10mer peptide sequences identified from SARS-CoV2 NSP12 with OC43, HKU1 and NL63. All peptides shown have a predicted binding score of  $\geq 0.90$

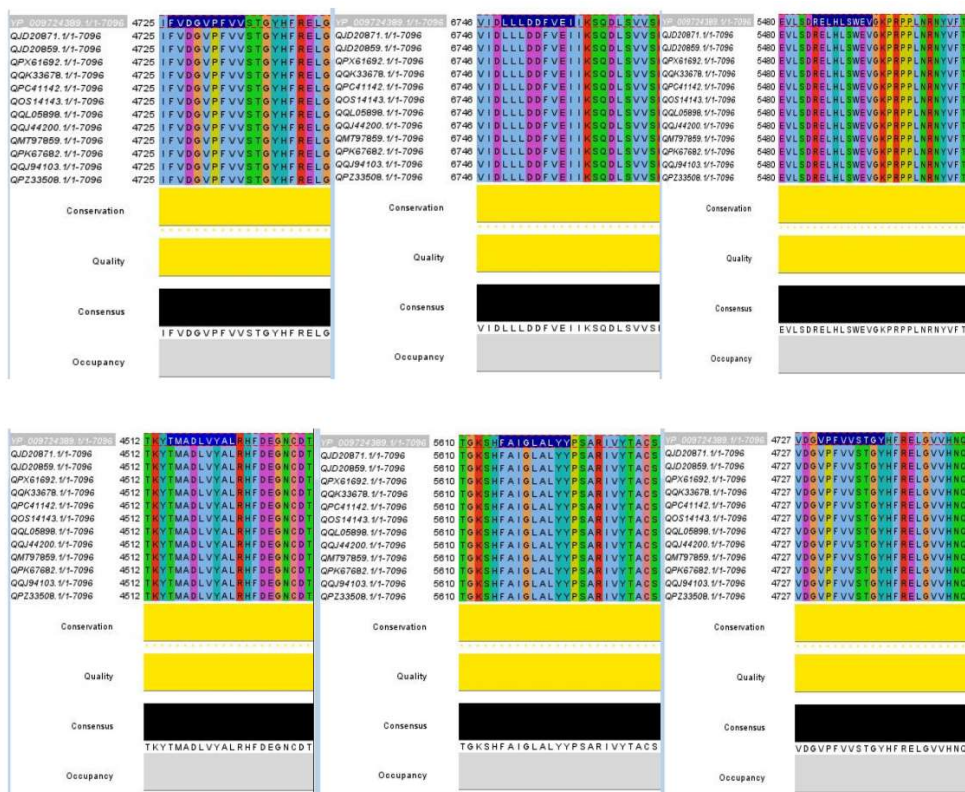

**Supplementary figure 3: Conservation analysis of six candidate CD8+ T cell epitopes which had a high degree of homology (>75%) with HCoV and a binding score of  $\geq 0.90$  with the SARS-CoV2 variants in different countries, and with the new UK variant (B.1.1.7) and the new South African variant 501.V2. The multiple alignments were performed using Clustal omega, which shows that these epitopes are highly conserved within the different variants of the SARS-CoV2 including the new variants which have emerged in the UK and South Africa.**

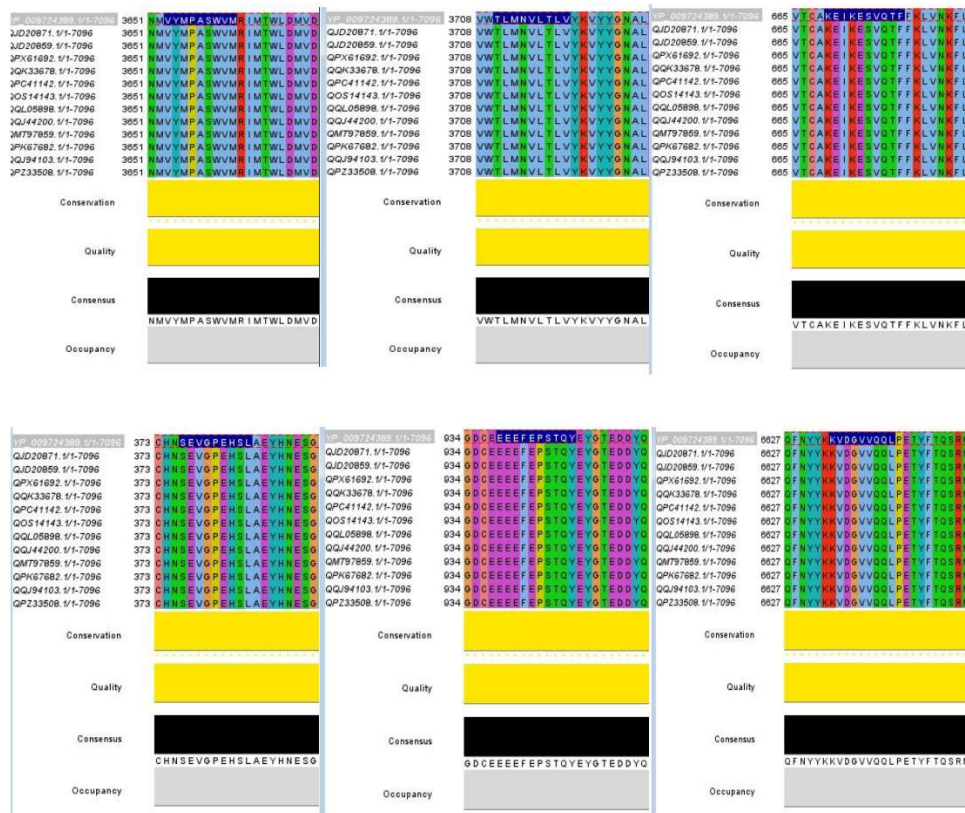

**Supplementary figure 4: Conservation analysis of six candidate CD8+ T cell epitopes which were specific to SARS-CoV2 (<25% homology with HCoV) and a binding score of  $\geq 0.90$  with the SARS-CoV2 variants in different countries, and with the new UK variant (B.1.1.7) and the new South African variant 501.V2. The multiple alignments were performed using Clustal omega, which shows that these epitopes are highly conserved within the different variants of the SARS-CoV2 including the new variants which have emerged in the UK and South Africa.**



**Supplementary table 2: Highly conserved candidate CD8+ T cell epitopes which had a high degree of homology (>75%) with HCoV and a binding score of  $\geq 0.90$**

| Candidate CD8+ T cell 9mer epitopes |            |                                           |       |      |      |      |                    |                    |                             |
|-------------------------------------|------------|-------------------------------------------|-------|------|------|------|--------------------|--------------------|-----------------------------|
| Protein                             | HLA Allele | Sequence                                  | Score | OC43 | HKU1 | NL63 | LKR current strain | UK B.1.1.7 variant | South Africa 501.V2 variant |
| Spike                               | A*24:02    | <sup>1208</sup> QYIKWPWYI <sup>1216</sup> | 0.95  | 77   | 77   | 77   | 100                | 100                | 100                         |
| Membrane                            | A*24:02    | <sup>95</sup> YFIASFRLF <sup>103</sup>    | 0.91  | 77   | 77   | 77   | 100                | 100                | 100                         |
| NSP12                               | A*02:01    | <sup>123</sup> TMADLVYAL <sup>131</sup>   | 0.93  | 77   | 77   | 77   | 100                | 100                | 100                         |
| NSP12                               | A*02:06    | <sup>334</sup> FVDGVPFVV <sup>342</sup>   | 0.93  | 100  | 100  | 88   | 100                | 100                | 100                         |
| NSP12                               | A*02:01    | <sup>854</sup> LMIERFVSL <sup>862</sup>   | 0.91  | 88   | 88   | 55   | 100                | 100                | 100                         |
| NSP12                               | A*02:01    | <sup>334</sup> FVDGVPFVV <sup>342</sup>   | 0.90  | 100  | 100  | 88   | 100                | 100                | 100                         |
| NSP12                               | B*44:03    | <sup>608</sup> VENPHLMGW <sup>616</sup>   | 0.99  | 77   | 77   | 88   | 100                | 100                | 100                         |
| NSP12                               | B*35:01    | <sup>337</sup> VPFVVSTGY <sup>345</sup>   | 0.97  | 88   | 88   | 55   | 100                | 100                | 100                         |
| NSP13                               | A*02:01    | <sup>239</sup> TLVPQEHYV <sup>247</sup>   | 0.95  | 77   | 77   | 44   | 100                | 100                | 100                         |
| NSP13                               | A*24:02    | <sup>397</sup> VYIGDPAQL <sup>405</sup>   | 0.91  | 100  | 100  | 77   | 100                | 100                | 100                         |
| NSP13                               | A*02:06    | <sup>239</sup> TLVPQEHYV <sup>247</sup>   | 0.91  | 77   | 77   | 44   | 100                | 100                | 100                         |

|       |         |                                         |      |    |    |    |     |     |     |
|-------|---------|-----------------------------------------|------|----|----|----|-----|-----|-----|
| NSP13 | B*35:01 | <sup>291</sup> FAIGLALYY <sup>299</sup> | 0.96 | 77 | 77 | 66 | 100 | 100 | 100 |
| NSP13 | B*44:03 | <sup>141</sup> TEETFKLSY <sup>149</sup> | 0.96 | 77 | 77 | 55 | 100 | 100 | 100 |
| NSP13 | B*40:02 | <sup>161</sup> RELHLSWEV <sup>169</sup> | 0.91 | 77 | 77 | 66 | 100 | 100 | 100 |
| NSP14 | A*02:01 | <sup>176</sup> NLSDRVVFV <sup>184</sup> | 0.93 | 77 | 66 | 77 | 100 | 100 | 100 |
| NSP14 | B*35:01 | <sup>509</sup> WVYKQFDY <sup>517</sup>  | 0.65 | 77 | 77 | 55 | 100 | 100 | 100 |
| NSP15 | A*02:01 | <sup>297</sup> LLDDFVEI <sup>305</sup>  | 0.95 | 66 | 88 | 88 | 100 | 100 | 100 |
| NSP15 | B*35:03 | <sup>49</sup> LPVNVAFEL <sup>57</sup>   | 0.96 | 77 | 66 | 88 | 100 | 100 | 100 |

**Supplementary table 3: Highly conserved candidate CD8+ T cell epitopes which were specific to SARS-CoV2 (<25% homology with HCoV) and a binding score of  $\geq 0.90$  with the SARS-CoV2 variants in different countries**

| Candidate 9mer epitopes |            |                                           |       |        |        |        |       |      |          |
|-------------------------|------------|-------------------------------------------|-------|--------|--------|--------|-------|------|----------|
| Protein                 | HLA allele | Sequence                                  | Score | OC43 % | HKU1 % | NL63 % | SRL % | UK % | Africa % |
| Spike                   | A*24:02    | <sup>635</sup> VYSTGSNVF <sup>643</sup>   | 0.93  | 22     | 22     | 22     | 100   | 100  | 100      |
| Spike                   | A*02:01    | <sup>109</sup> TLDSKTQSL <sup>117</sup>   | 0.91  | 22     | 22     | 33     | 100   | 100  | 100      |
| Spike                   | B*35:01    | <sup>83</sup> LPFNDGVYF <sup>91</sup>     | 0.98  | 22     | 33     | 11     | 100   | 100  | 100      |
| Spike                   | B*35:01    | <sup>686</sup> VASQSIIAY <sup>694</sup>   | 0.98  | 0      | 0      | 0      | 100   | 100  | 100      |
| Spike                   | B*40:01    | <sup>1015</sup> AEIRASANL <sup>1023</sup> | 0.98  | 22     | 22     | 44     | 100   | 100  | 100      |
| Nucleocapsid            | B*35:01    | <sup>325</sup> TPSGTWLTY <sup>333</sup>   | 0.99  | 22     | 22     | 22     | 100   | 100  | 100      |
| Nucleocapsid            | B*44:03    | <sup>322</sup> MEVTPSGTW <sup>330</sup>   | 0.96  | 11     | 11     | 0      | 100   | 100  | 100      |
| NSP1                    | B*40:02    | <sup>56</sup> VEKGVLPQL <sup>64</sup>     | 0.98  | 22     | 22     | 11     | 100   | 100  | 100      |
| NSP1                    | B*35:01    | <sup>110</sup> HVGEIPVAY <sup>118</sup>   | 0.95  | 22     | 11     | 11     | 100   | 100  | 100      |
| NSP2                    | A*24:02    | <sup>497</sup> TFFKLVNKF <sup>505</sup>   | 0.90  | 33     | 22     | 22     | 100   | 100  | 100      |
| NSP2                    | B*40:01    | <sup>195</sup> SEVGPEHSL <sup>203</sup>   | 0.99  | 11     | 11     | 0      | 100   | 100  | 100      |
| NSP2                    | B*40:01    | <sup>562</sup> GETLPTEVL <sup>570</sup>   | 0.99  | 0      | 0      | 0      | 100   | 100  | 100      |

|                          |         |                                           |      |        |        |        |     |     |        |
|--------------------------|---------|-------------------------------------------|------|--------|--------|--------|-----|-----|--------|
| NSP2                     | B*44:03 | <sup>52</sup> REHEHEIAW <sup>60</sup>     | 0.98 | 22     | 22     | 22     | 100 | 100 | 100    |
| NSP3                     | A*24:02 | <sup>726</sup> YYTSNPTTF <sup>734</sup>   | 0.99 | 22     | 22     | 22     | 100 | 100 | 100    |
| NSP3                     | A*24:02 | <sup>1349</sup> NYMPYFFTL <sup>1357</sup> | 0.98 | 33     | 22     | 11     | 100 | 100 | 100    |
| NSP3                     | A*24:02 | <sup>816</sup> YYHTTDPSF <sup>824</sup>   | 0.96 | 11     | 11     | 0      | 100 | 100 | 100    |
| NSP3                     | B*44:03 | <sup>120</sup> EEFEPSTQY <sup>128</sup>   | 0.99 | 11     | 11     | 0      | 100 | 100 | 100    |
| NSP3                     | B*44:03 | <sup>546</sup> QEILGTVSW <sup>554</sup>   | 0.99 | 22     | 22     | 0      | 100 | 100 | 100    |
| NSP3                     | B*40:01 | <sup>1799</sup> AELAKNVSL <sup>1807</sup> | 0.98 | 0      | 0      | 0      | 100 | 100 | 100    |
| NSP4                     | A*24:02 | <sup>351</sup> FYLTNDVSF <sup>359</sup>   | 0.92 | 22     | 22     | 22     | 100 | 100 | 100    |
| NSP4                     | B*35:01 | <sup>174</sup> NVLEGSVAY <sup>182</sup>   | 0.97 | 11     | 11     | 44     | 100 | 100 | 100    |
| NSP6                     | A*02:01 | <sup>141</sup> TLMNVLT <sup>149</sup>     | 0.92 | 0      | 0      | 0      | 100 | 100 | 100    |
| NSP6                     | A*24:02 | <sup>84</sup> VYMPASWVM <sup>92</sup>     | 0.91 | 0      | 0      | 11     | 100 | 100 | 100    |
| NSP6                     | A*24:02 | <sup>115</sup> MYASAVVLL <sup>123</sup>   | 0.90 | 22     | 22     | 22     | 100 | 100 | 100    |
| NSP14                    | A*02:01 | <sup>321</sup> LLADKFPVL <sup>329</sup>   | 0.94 | 11     | 11     | 33     | 100 | 100 | 100    |
| NSP15                    | A*02:06 | <sup>181</sup> KVDGVVQQL <sup>189</sup>   | 0.92 | 22     | 22     | 11     | 100 | 100 | 100    |
| Candidate 10mer epitopes |         |                                           |      |        |        |        |     |     |        |
| Protein                  | HLA     | Sequence                                  | Sore | OC43 % | HKU1 % | NL63 % | SRL | UK  | Africa |
|                          | Allele  |                                           |      |        |        |        |     |     |        |
| Spike                    | B*44:02 | <sup>95</sup> TEKSNIIRGW <sup>104</sup>   | 0.95 | 10     | 0      | 10     | 100 | 100 | 100    |

|       |         |                                          |      |    |    |    |     |     |     |
|-------|---------|------------------------------------------|------|----|----|----|-----|-----|-----|
| NSP2  | B*44:03 | <sup>489</sup> KEIKESVQTF <sup>498</sup> | 0.95 | 0  | 0  | 10 | 100 | 100 | 100 |
| NSP3  | B*44:03 | <sup>120</sup> EEEFEPSTQY <sup>129</sup> | 0.98 | 20 | 10 | 0  | 100 | 100 | 100 |
| NSP3  | B*35:01 | <sup>502</sup> VPTDNYITTY <sup>511</sup> | 0.94 | 0  | 0  | 0  | 30  | 30  | 30  |
| NSP14 | B*35:01 | <sup>42</sup> IPGIPKDMTY <sup>51</sup>   | 0.92 | 20 | 20 | 30 | 100 | 100 | 100 |



**Supplementary table 4:** The candidate CD8+ T cell epitopes (<25% homology with other HCoV) and their predicted HLA allele, the published CD8+ T cell epitopes (marked in red) and their HLA restriction.

| Candidate epitopes and the published epitopes<br>(marked in red if they overlapped with the<br>candidate epitopes) | Predicted HLA allele | Published alle | Protein      |
|--------------------------------------------------------------------------------------------------------------------|----------------------|----------------|--------------|
| VPTDNYITTY                                                                                                         | B*35:01              | A*0101         | NSP3         |
| YYHTTDPSTF                                                                                                         | A*24:02              | A*0101         | NSP3         |
| SALWEIQQVV                                                                                                         | A*02:01              | A*0201         | NSP8         |
| TYVPAQEKNF                                                                                                         | A*24:02              | A*0201         | Spike        |
| GMEVTPSGTW                                                                                                         | B*44:03              | A*0201         | Nucleocapsid |
| EELKKLLEQW                                                                                                         | B*44:03              | A*0201         | Membrane     |
| VTLAILTALR                                                                                                         | A*33:03              | A*0201         | Envelope     |
| TLDSKTQSL                                                                                                          | A*02:01              | A*0201         | Spike        |
| LPFNDGVYF                                                                                                          | B*35:01              | A*0301         | Spike        |
| NTPKDHIGTR                                                                                                         | A*33:03              | A*1101         | Nucleocapsid |
| LPFNDGVYF                                                                                                          | B*35:01              | A*1101         | Spike        |
| SRVKNLNSSR                                                                                                         | A*33:03              | A*2402         | Envelope     |

|            |         |        |              |
|------------|---------|--------|--------------|
| NYMPYFFTL  | A*24:02 | A*2402 | NSP3         |
| YYTSNPTTF  | A*24:02 | A*2402 | NSP3         |
| GETLPTEVL  | B*40:01 | B*4001 | NSP2         |
| MEVTPSGTWL | B*40:01 | B*4001 | Nucleocapsid |
| SELVIGAVIL | B*40:01 | B*4001 | Membrane     |
| KLNEEIAILL | A*02:01 | B*4403 | NSP2         |
| MEVTPSGTW  | B*44:03 | B*4403 | Nucleocapsid |
| QEILGTVSW  | B*44:03 | B*4403 | NSP3         |

**Supplementary table 5:** The candidate CD8+ T cell epitopes (?75% homology with other HCoV)s and their predicted HLA allele, the published CD8+ T cell epitopes (marked in red) and their HLA restriction.

| Candidate epitopes and the published epitopes<br>(marked in red if they overlapped with the<br>candidate epitopes) | Predicted HLA allele | Published alle | Protein |
|--------------------------------------------------------------------------------------------------------------------|----------------------|----------------|---------|
| VLNDILSRL                                                                                                          | A*02:01              | A*0201         | Spike   |
| NYDLSVVNAR                                                                                                         | A*33:03              | A*1101         | NSP13   |
| WVYKQFDY                                                                                                           | B*35:01              | A*1101         | NSP14   |

|            |         |        |       |
|------------|---------|--------|-------|
| QYIKWPWYI  | A*24:02 | A*2402 | Spike |
| VYIGDPAQL  | A*24:02 | A*2402 | NSP13 |
| NPKTPKYKF  | B*35:01 | B*0801 | NSP5  |
| EEAIRHVRAW | B*44:02 | B*4403 | NSP14 |
